# Supplementary material for: Corticosterone and exogenous glucose alter blood glucose levels, neurotoxicity, and vascular toxicity produced by methamphetamine
Source: PubMed Central journal article supplement — J Neurochem. 2017 Sep 21;143(2):198–213. doi: 10.1111/jnc.14143 (PMC5763366; doi:10.1111/jnc.14143), 2017-09-21
Supplement: JNC-143-198-s001.pdf [file JNC-143-198-s001.pdf]

Corticosterone and Exogenous Glucose Alter Blood Glucose levels, Neurotoxicity,  
and Vascular Toxicity Produced by Methamphetamine

\*John F. Bowyer<sup>a</sup>, Karen M. Tranter<sup>a</sup>, Sumit Sarkar<sup>a</sup>, Nysia I. George<sup>b</sup>, Joseph P. Hanig<sup>c</sup>,  
Kimberly A. Kelly<sup>d</sup>, Lindsay T. Michalovicz<sup>d</sup>, Diane B. Miller<sup>d</sup>, and James P. O'Callaghan<sup>d</sup>

<sup>a</sup>Division of Neurotoxicology, National Center for Toxicology/ FDA, Jefferson, AR 72079

<sup>b</sup> Division of Bioinformatics and Biostatistics, National Center for Toxicological Research, FDA  
Jefferson, AR 72079, USA

<sup>c</sup>Center for Drug Evaluation and Research/ FDA Silver Spring, MD 20993 USA

<sup>d</sup>Health Effects Laboratory Division, Centers for Disease Control and Prevention, National  
Institute for Occupational Safety and Health Morgantown, WV 26505

Corresponding author:

**\*John F. Bowyer**, Ph.D  
National Center for Toxicological Research/FDA  
3900 NCTR Road, HFT-132,  
Jefferson, AR-72079  
Tel: 870-543-7194  
Fax: 870-543-7745  
Email: [john.bowyer@fda.hhs.gov](mailto:john.bowyer@fda.hhs.gov)

Supplemental File 1. Raw counts of FJc- labeled neurons for each evaluator that  
that were used in determining treatment effects on degeneration.

**Supplemental File 1**

| Treatment | Evaluators       | Brain Region<br>Parietal Cortex |     |        |        | Brain Region<br>PV Thalamus |     |        |        | Brain Region<br>IL/ VM/ VL Thalamus |     |        |        |
|-----------|------------------|---------------------------------|-----|--------|--------|-----------------------------|-----|--------|--------|-------------------------------------|-----|--------|--------|
|           |                  | KT                              | JFB | KK JPO | Slice# | KT                          | JFB | KK JPO | Slice# | KT                                  | JFB | KK JPO | Slice# |
| Saline    | Rat ID<br>FG 255 | 0                               | 0   | 0      | #1     | 0                           | 2   | 0      | #4     | 0                                   | 0   | 0.5    | #4     |
|           |                  | 0                               | 0   | 0.5    | #2     | 0                           | 1   | 0      | #5     | 0                                   | 0   | 0      | #5     |
|           |                  | 0                               | 0   | 1.5    | #3     | 0                           | 0   | 3      | #6     | 0                                   | 0   | 0.5    | #6     |
| Saline    | Rat ID<br>FG 264 | 0                               | 0   | 0.5    | #1     | 0                           | 0   | 0      | #6     | 0                                   | 0   | 0      | #6     |
|           |                  | 0                               | 0   | 3      | #2     | 0                           | 0   | 0      | #7     | 0                                   | 0   | 0      | #7     |
|           |                  | 0                               | 0   | 0      | #3     | 0                           | 0   | 0      | #8     | 0                                   | 0   | 0      | #8     |
|           |                  | 0                               | 0   | 0      | #4     | 0                           | 0   | 0      | #9     | 0                                   | 0   | 0      | #9     |
| Saline    | Rat ID<br>FG 275 | 0.5                             | 0   | 0      | #2     | 0                           | 0   | 0      | #6     | 1                                   | 0   | 0      | #6     |
|           |                  | 1                               | 0   | 0      | #3     | 0                           | 0   | 0      | #8     | 3                                   | 0   | 0.5    | #8     |
|           |                  | 0                               | 0   | 0      | #4     | 0                           | 0   | 0      | #9     | 1.5                                 | 0.5 | 0      | #9     |
|           |                  | 0                               | 0   | 0      | #5     | 0                           | 0   | 0      | #10    | 0                                   | 1   | 0      | #10    |
| Saline    | Rat ID<br>FG 295 | 0                               | 0   | 0      | #1     | 0                           | 0   | 0      | #5     | 0                                   | 0   | 0      | #5     |
|           |                  | 0                               | 0   | 0      | #2     | 0                           | 0   | 0      | #6     | 0                                   | 0   | 0      | #6     |
|           |                  | 0                               | 0   | 0      | #3     | 0                           | 0   | 0      | #7     | 0                                   | 0   | 0      | #7     |
|           |                  | 0                               | 0   | 0      | #4     | 0                           | 1   | 0      | #8     | 0                                   | 0   | 0      | #8     |
| Saline    | Rat ID<br>FG 307 | 3.5                             | 0   | 1      | #1     | 0                           | 0   | 0      | #5     | 0.5                                 | 0   | 0      | #5     |
|           |                  | 1.5                             | 0   | 1      | #2     | 0                           | 0   | 2      | #6     | 0                                   | 0   | 2.5    | #6     |
|           |                  | 0                               | 0   | 2.5    | #3     | 0                           | 0   | 1      | #7     | 0.5                                 | 0   | 2.5    | #7     |
|           |                  | 2                               | 0   | 4      | #4     | 0                           | 0   | 2      | #8     | 1                                   | 0   | 1      | #8     |
| Glucose   | Rat ID<br>FG 256 | 0                               | 0   | 0.5    | #1     | 0                           | 0   | 0      | #3     | 0                                   | 0   | 0      | #3     |
|           |                  | 0                               | 0   | 0.5    | #2     | 0                           | 0   | 0      | #4     | 0                                   | 0   | 0      | #4     |
|           |                  | 0                               | 0   | 0.5    | #3     | 0                           | 0   | 0      | #5     | 0                                   | 0   | 0      | #5     |
| Glucose   | Rat ID<br>FG 257 | 1.5                             | 0   | 0.5    | #1     | 2                           | 0   | 0      | #5     | 0                                   | 0   | 0      | #5     |
|           |                  | 0                               | 0   | 2      | #2     | 0                           | 0   | 0      | #6     | 0                                   | 0   | 0      | #6     |
|           |                  | 2.5                             | 0   | 0      | #3     | 0                           | 0   | 0      | #7     | 0                                   | 0   | 0      | #7     |
|           |                  | 0                               | 0   | 0      | #8     | 3                           | 0   | 0      | #9     | 0                                   | 0   | 0      | #9     |
| Glucose   | Rat ID<br>FG 265 | 0                               | 0   | 0      | #1     | 0                           | 0   | 0      | #5     | 0                                   | 0   | 0      | #5     |
|           |                  | 0                               | 0   | 0      | #2     | 0                           | 0   | 0      | #6     | 0                                   | 0   | 0      | #6     |
|           |                  | 0                               | 0   | 0      | #3     | 0                           | 0   | 0      | #7     | 0                                   | 0   | 0.5    | #7     |
|           |                  | 0                               | 0   | 0      | #4     | 0                           | 0   | 0      | #8     | 0                                   | 0   | 0      | #8     |

|         |                          |   |   |   |    |  |   |   |   |    |  |   |   |   |    |
|---------|--------------------------|---|---|---|----|--|---|---|---|----|--|---|---|---|----|
| Glucose | <b>Rat ID<br/>FG 297</b> | 0 | 0 | 0 | #1 |  | 0 | 0 | 0 | #5 |  | 0 | 0 | 0 | #5 |
|         |                          | 0 | 0 | 0 | #2 |  | 0 | 0 | 0 | #6 |  | 0 | 0 | 0 | #6 |
|         |                          | 0 | 0 | 0 | #5 |  | 0 | 0 | 0 | #7 |  | 0 | 0 | 0 | #7 |
|         |                          | 0 | 0 | 0 | #8 |  | 0 | 0 | 0 | #9 |  | 0 | 0 | 0 | #9 |

|         |                          |   |   |     |    |  |   |   |   |    |  |   |   |   |    |
|---------|--------------------------|---|---|-----|----|--|---|---|---|----|--|---|---|---|----|
| Glucose | <b>Rat ID<br/>FG 309</b> | 0 | 0 | 0.5 | #1 |  | 0 | 0 | 0 | #5 |  | 0 | 0 | 0 | #5 |
|         |                          | 1 | 0 | 0   | #2 |  | 0 | 0 | 0 | #6 |  | 0 | 0 | 0 | #6 |
|         |                          | 1 | 0 | 0   | #3 |  | 0 | 0 | 0 | #7 |  | 0 | 0 | 0 | #7 |
|         |                          | 0 | 0 | 0   | #4 |  | 0 | 0 | 0 | #8 |  | 0 | 0 | 0 | #8 |

|      |                          |     |     |   |    |  |   |   |   |    |  |   |     |   |    |
|------|--------------------------|-----|-----|---|----|--|---|---|---|----|--|---|-----|---|----|
| CORT | <b>Rat ID<br/>FG 276</b> | 0   | 0   | 0 | #1 |  | 0 | 0 | 0 | #5 |  | 0 | 0   | 0 | #5 |
|      |                          | 0   | 0.5 | 0 | #2 |  | 0 | 0 | 0 | #6 |  | 0 | 0   | 0 | #6 |
|      |                          | 0   | 0   | 0 | #5 |  | 0 | 0 | 0 | #7 |  | 0 | 0.5 | 0 | #7 |
|      |                          | 0.5 | 0   | 0 | #6 |  | 0 | 0 | 0 | #9 |  | 0 | 0   | 0 | #9 |

|      |                          |   |     |     |    |  |   |   |   |    |  |   |     |   |    |
|------|--------------------------|---|-----|-----|----|--|---|---|---|----|--|---|-----|---|----|
| CORT | <b>Rat ID<br/>FG 277</b> | 0 | 0   | 0   | #2 |  | 0 | 0 | 0 | #6 |  | 0 | 0   | 0 | #6 |
|      |                          | 0 | 0   | 0   | #3 |  | 0 | 0 | 0 | #7 |  | 0 | 0.5 | 0 | #7 |
|      |                          | 0 | 0.5 | 0   | #4 |  | 0 | 0 | 0 | #8 |  | 0 | 0   | 0 | #8 |
|      |                          | 0 | 1   | 1.5 | #5 |  | 0 | 0 | 0 | #9 |  | 0 | 0   | 0 | #9 |

|      |                          |   |   |   |     |  |   |   |   |     |  |   |   |   |     |
|------|--------------------------|---|---|---|-----|--|---|---|---|-----|--|---|---|---|-----|
| CORT | <b>Rat ID<br/>FG 287</b> | 0 | 0 | 0 | #9  |  | 0 | 0 | 0 | #8  |  | 0 | 0 | 0 | #8  |
|      |                          | 0 | 0 | 0 | #10 |  | 0 | 0 | 0 | #13 |  | 0 | 0 | 0 | #13 |
|      |                          | 0 | 0 | 0 | #11 |  | 0 | 0 | 0 | #14 |  | 0 | 0 | 0 | #14 |
|      |                          | 0 | 0 | 0 | #12 |  | 0 | 0 | 0 | #15 |  | 0 | 0 | 0 | #15 |

|      |                          |   |     |  |    |  |   |   |  |    |  |   |   |  |    |
|------|--------------------------|---|-----|--|----|--|---|---|--|----|--|---|---|--|----|
| CORT | <b>Rat ID<br/>FG 296</b> | 0 | 0   |  | #1 |  | 0 | 0 |  | #4 |  | 0 | 0 |  | #4 |
|      |                          | 0 | 0   |  | #2 |  | 0 | 0 |  | #5 |  | 0 | 0 |  | #5 |
|      |                          | 0 | 0   |  | #3 |  | 0 | 0 |  | #6 |  | 0 | 0 |  | #6 |
|      |                          | 0 | 0.5 |  | #4 |  | 0 | 0 |  | #7 |  | 0 | 0 |  | #7 |

|      |                          |     |     |     |    |  |   |   |   |    |  |   |   |   |    |
|------|--------------------------|-----|-----|-----|----|--|---|---|---|----|--|---|---|---|----|
| CORT | <b>Rat ID<br/>FG 308</b> | 4   | 0   | 0.5 | #1 |  | 0 | 0 | 0 | #5 |  | 0 | 0 | 0 | #5 |
|      |                          | 1   | 0.5 | 0   | #2 |  | 0 | 0 | 0 | #6 |  | 0 | 0 | 0 | #6 |
|      |                          | 1.5 | 0   | 0   | #3 |  | 0 | 0 | 3 | #7 |  | 0 | 0 | 0 | #7 |
|      |                          | 2   | 0.5 | 0   | #4 |  | 0 | 0 | 3 | #8 |  | 0 | 0 | 0 | #8 |

|      |                          |      |     |      |     |  |   |   |   |     |  |    |    |      |     |
|------|--------------------------|------|-----|------|-----|--|---|---|---|-----|--|----|----|------|-----|
| METH | <b>Rat ID<br/>FG 227</b> | 10   | 8.5 | 5.5  | #2  |  | 0 | 3 | 2 | #4  |  | 19 | 21 | 19.5 | #8  |
|      |                          | 10.5 | 10  | 10.5 | #4  |  | 3 | 3 | 9 | #8  |  | 8  | 7  | 2.5  | #11 |
|      |                          | 7.5  | 7   | 4.5  | #7  |  | 2 | 2 | 1 | #12 |  | 7  | 13 | 14.5 | #12 |
|      |                          | 7    | 7.5 | 2    | #10 |  | 1 | 2 | 3 | #13 |  | 6  | 10 | 9    | #13 |

|      |                          |      |     |      |    |  |   |   |    |     |  |       |       |       |     |
|------|--------------------------|------|-----|------|----|--|---|---|----|-----|--|-------|-------|-------|-----|
| METH | <b>Rat ID<br/>FG 228</b> | 16   | 6   | 15   | #2 |  | 6 | 5 | 5  | #4  |  | 154   | 169.5 | 180.5 | #4  |
|      |                          | 12.5 | 9   | 13.5 | #3 |  | 5 | 6 | 3  | #8  |  | 195   | 146   | 173   | #5  |
|      |                          | 11.5 | 7   | 7.5  | #6 |  | 8 | 6 | 28 | #9  |  | 178   | 139.5 | 162.5 | #8  |
|      |                          | 9    | 6.5 | 8.5  | #7 |  | 4 | 8 | 18 | #11 |  | 145.5 | 123.5 | 179.5 | #10 |

|      |                          |   |   |     |    |  |   |   |   |     |  |      |      |      |     |
|------|--------------------------|---|---|-----|----|--|---|---|---|-----|--|------|------|------|-----|
| METH | <b>Rat ID<br/>FG 267</b> | 1 | 2 | 0   | #1 |  | 8 | 9 | 1 | #5  |  | 26.5 | 39.5 | 39.5 | #10 |
|      |                          | 4 | 4 | 3.5 | #2 |  | 7 | 9 | 4 | #10 |  | 36   | 60   | 54.5 | #11 |

|     |   |     |     |  |    |   |    |     |  |      |      |      |     |
|-----|---|-----|-----|--|----|---|----|-----|--|------|------|------|-----|
| 4.5 | 6 | 3.5 | #7  |  | 10 | 7 | 11 | #11 |  | 26.5 | 24.5 | 36.5 | #12 |
| 5.5 | 4 | 7.5 | #14 |  | 6  | 6 | 8  | #13 |  | 29.5 | 32.5 | 54   | #13 |

METH  
Rat ID  
FG 268

|      |      |   |    |  |   |   |   |     |  |   |     |     |     |
|------|------|---|----|--|---|---|---|-----|--|---|-----|-----|-----|
| 8    | 7.5  | 8 | #1 |  | 2 | 0 | 1 | #8  |  | 1 | 4   | 0   | #8  |
| 10.5 | 10   | 5 | #2 |  | 0 | 0 | 0 | #12 |  | 4 | 5.5 | 2.5 | #12 |
| 5.5  | 13.5 | 3 | #4 |  | 0 | 0 | 0 | #15 |  | 0 | 1   | 0   | #15 |
| 11.5 | 13   | 8 | #6 |  | 0 | 0 | 0 | #17 |  | 0 | 1.5 | 0   | #17 |

METH  
Rat ID  
FG 310

|     |     |     |    |  |   |   |   |     |  |      |      |      |     |
|-----|-----|-----|----|--|---|---|---|-----|--|------|------|------|-----|
| 3.5 | 3   | 3   | #2 |  | 3 | 4 | 3 | #5B |  | 76.5 | 86   | 76.5 | #5A |
| 2.5 | 3.5 | 2.5 | #3 |  | 5 | 5 | 5 | #6  |  | 24.5 | 44.5 | 24.5 | #5B |
| 2.5 | 4.5 | 2   | #4 |  | 5 | 5 | 5 | #10 |  | 72.5 | 72.5 | 72.5 | #10 |
| 2   | 8   | 1   | #8 |  | 6 | 7 | 6 | #11 |  | 35.5 | 31   | 35.5 | #11 |

METH  
Rat ID  
FG 311

|     |     |     |     |  |    |   |    |     |  |      |      |      |     |
|-----|-----|-----|-----|--|----|---|----|-----|--|------|------|------|-----|
| 8.5 | 7   | 6.5 | #1  |  | 6  | 6 | 6  | #6  |  | 60.5 | 46.5 | 56   | #7  |
| 5   | 5   | 3.5 | #2  |  | 6  | 6 | 7  | #7  |  | 42.5 | 49.5 | 25.5 | #8  |
| 3   | 5   | 2   | #3  |  | 4  | 5 | 5  | #13 |  | 62.5 | 78   | 57.5 | #13 |
| 4.5 | 4.5 | 6.5 | #10 |  | 10 | 8 | 12 | #14 |  | 47.5 | 57   | 41.5 | #14 |

METH + Vehicle  
Rat ID  
FG 280

|   |     |     |    |  |   |   |   |     |  |    |      |    |     |
|---|-----|-----|----|--|---|---|---|-----|--|----|------|----|-----|
| 2 | 6   | 2.5 | #1 |  | 2 | 3 | 2 | #7  |  | 11 | 13   | 16 | #6  |
| 4 | 7   | 3.5 | #3 |  | 6 | 3 | 6 | #12 |  | 10 | 15.5 | 16 | #7  |
| 5 | 5.5 | 5   | #8 |  | 4 | 4 | 6 | #13 |  | 14 | 17   | 20 | #10 |
| 5 | 5   | 4   | #9 |  | 5 | 4 | 4 | #14 |  | 17 | 15.5 | 19 | #14 |

METH + Vehicle  
Rat ID  
FG 288

|     |     |     |     |  |   |   |   |     |  |      |      |      |     |
|-----|-----|-----|-----|--|---|---|---|-----|--|------|------|------|-----|
| 3.5 | 2   | 6   | #3  |  | 2 | 4 | 2 | #5  |  | 19.5 | 17   | 15   | #7  |
| 2   | 2   | 1.5 | #6  |  | 2 | 5 | 2 | #8  |  | 17   | 19.5 | 13.5 | #9  |
| 4   | 4.5 | 2   | #13 |  | 6 | 4 | 7 | #10 |  | 16   | 19.5 | 17   | #16 |
| 1.5 | 2   | 0.5 | #15 |  | 0 | 2 | 1 | #16 |  | 17   | 22.5 | 18   | #17 |

METH + Vehicle  
Rat ID  
FG 289

|      |      |     |     |  |    |   |   |     |  |      |      |      |     |
|------|------|-----|-----|--|----|---|---|-----|--|------|------|------|-----|
| 17   | 14.5 | 13  | #4  |  | 4  | 5 | 2 | #6  |  | 47   | 68.5 | 47   | #7  |
| 10   | 7.5  | 6   | #5  |  | 10 | 7 | 7 | #7  |  | 9.5  | 11.5 | 12.5 | #13 |
| 15.5 | 12.5 | 14  | #10 |  | 2  | 5 | 2 | #8  |  | 54.5 | 48.5 | 49   | #14 |
| 7    | 12.5 | 7.5 | #11 |  | 0  | 8 | 0 | #13 |  | 39.5 | 38   | 43   | #15 |

METH + Vehicle  
Rat ID  
FG 298

|    |      |      |    |  |   |   |   |    |  |   |     |     |     |
|----|------|------|----|--|---|---|---|----|--|---|-----|-----|-----|
| 10 | 11   | 8.5  | #3 |  | 0 | 3 | 0 | #6 |  | 2 | 3.5 | 2   | #9  |
| 9  | 10.5 | 8    | #4 |  | 2 | 4 | 3 | #7 |  | 6 | 4   | 4.5 | #10 |
| 12 | 9    | 9.5  | #6 |  | 3 | 2 | 3 | #8 |  | 4 | 5   | 4   | #11 |
| 12 | 11   | 10.5 | #7 |  | 2 | 1 | 1 | #9 |  | 8 | 9   | 7   | #12 |

METH + Vehicle  
Rat ID  
FG 299

|     |     |     |     |  |   |   |   |     |  |      |     |     |     |
|-----|-----|-----|-----|--|---|---|---|-----|--|------|-----|-----|-----|
| 2   | 3   | 1.5 | #3  |  | 0 | 0 | 0 | #8  |  | 9.5  | 7.5 | 9.5 | #8  |
| 6   | 5   | 4.5 | #5  |  | 2 | 0 | 0 | #9  |  | 7    | 6.5 | 6.5 | #9  |
| 5.5 | 4.5 | 4   | #7  |  | 3 | 2 | 3 | #10 |  | 10.5 | 8   | 9.5 | #11 |
| 3   | 2.5 | 3   | #13 |  | 1 | 0 | 1 | #15 |  | 6    | 5   | 5   | #15 |

METH + Vehicle  
Rat ID  
FG 300

|      |      |      |    |  |   |   |   |     |  |     |     |     |     |
|------|------|------|----|--|---|---|---|-----|--|-----|-----|-----|-----|
| 13   | 17.5 | 23.5 | #3 |  | 0 | 1 | 0 | #8  |  | 5   | 4.5 | 3.5 | #9  |
| 20   | 14.5 | 18   | #7 |  | 2 | 2 | 2 | #9  |  | 5.5 | 4.5 | 4   | #10 |
| 18.5 | 17   | 16.5 | #6 |  | 3 | 3 | 2 | #13 |  | 4   | 5.5 | 5.5 | #11 |
| 27   | 20   | 24   | #7 |  | 1 | 1 | 1 | #14 |  | 5   | 4   | 5   | #16 |

METH+Glucose

|               |     |     |     |     |  |   |   |   |     |  |      |      |      |     |
|---------------|-----|-----|-----|-----|--|---|---|---|-----|--|------|------|------|-----|
| <b>Rat ID</b> | 1   | 2.5 | 0   | #1  |  | 2 | 2 | 2 | #5  |  | 18.5 | 30   | 14.5 | #10 |
| <b>FG 269</b> | 4.5 | 2   | 0   | #3  |  | 1 | 1 | 2 | #6  |  | 18.5 | 28.5 | 11   | #11 |
|               | 1.5 | 2   | 0.5 | #8  |  | 3 | 3 | 3 | #12 |  | 17   | 39.5 | 34.5 | #13 |
|               | 2   | 2   | 2.5 | #14 |  | 6 | 0 | 2 | #13 |  | 21.5 | 19   | 13   | #15 |

METH+Glucose

|               |     |      |     |     |  |   |   |   |     |  |     |   |     |     |
|---------------|-----|------|-----|-----|--|---|---|---|-----|--|-----|---|-----|-----|
| <b>Rat ID</b> |     |      |     | #3  |  | 0 | 1 | 0 | #8  |  | 0   | 8 | 1.5 | #8  |
| <b>FG 271</b> | 5.5 | 6    | 4.5 | #4  |  |   |   |   | #9  |  | 0   | 4 | 0   | #9  |
|               | 10  | 10.5 | 9   | #5  |  | 1 | 1 | 1 | #11 |  |     |   |     | #11 |
|               | 9.5 | 8.5  | 6.5 | #7  |  |   |   |   | #12 |  | 2.5 | 3 | 0   | #12 |
|               | 9.5 | 8    | 8.5 | #10 |  | 1 | 1 | 0 | #15 |  | 1.5 | 3 | 1.5 | #15 |
|               |     |      |     |     |  | 1 | 1 | 1 | #16 |  |     |   |     | #16 |

METH+Glucose

|               |   |     |  |     |  |   |   |  |     |  |     |      |  |     |
|---------------|---|-----|--|-----|--|---|---|--|-----|--|-----|------|--|-----|
| <b>Rat ID</b> | 2 | 3   |  | #3  |  | 2 | 2 |  | #4  |  | 4.5 | 14.5 |  | #4  |
| <b>FG 282</b> | 3 | 3   |  | #12 |  | 5 | 5 |  | #14 |  | 3   | 8.5  |  | #5  |
|               | 4 | 5.5 |  | #13 |  | 7 | 7 |  | #15 |  | 8   | 8.5  |  | #20 |
|               | 5 | 4   |  | #18 |  | 3 | 3 |  | #20 |  | 8.5 | 8.5  |  | #23 |

METH+Glucose

|               |      |      |     |     |  |    |    |    |    |  |       |       |       |     |
|---------------|------|------|-----|-----|--|----|----|----|----|--|-------|-------|-------|-----|
| <b>Rat ID</b> | 14   | 14.5 | 14  | #4  |  | 16 | 18 | 18 | #5 |  | 116.5 | 108.5 | 119.5 | #7  |
| <b>FG 291</b> | 19   | 12   | 13  | #12 |  | 39 | 25 | 41 | #6 |  | 123.5 | 87.5  | 117.5 | #8  |
|               | 9.5  | 7.5  | 9.5 | #13 |  | 38 | 22 | 38 | #7 |  | 104.5 | 75.5  | 106.5 | #9  |
|               | 10.5 | 9.5  | 9.5 | #14 |  | 13 | 20 | 16 | #8 |  | 158   | 95.5  | 148   | #10 |

METH+Glucose

|               |    |     |      |     |  |   |   |   |     |  |      |      |      |     |
|---------------|----|-----|------|-----|--|---|---|---|-----|--|------|------|------|-----|
| <b>Rat ID</b> | 10 | 7.5 | 10.5 | #1  |  | 3 | 3 | 3 | #7  |  | 47.5 | 35   | 44   | #7  |
| <b>FG 314</b> | 8  | 8   | 4.5  | #3  |  | 4 | 3 | 3 | #8  |  | 44   | 46.5 | 42   | #8  |
|               | 14 | 8   | 12   | #4  |  | 4 | 3 | 4 | #9  |  | 36.5 | 26.5 | 34.5 | #9  |
|               | 12 | 11  | 12   | #12 |  | 2 | 2 | 1 | #13 |  | 34   | 33.5 | 33.5 | #13 |

METH+Glucose

|               |      |    |      |     |  |    |    |    |     |  |       |       |       |     |
|---------------|------|----|------|-----|--|----|----|----|-----|--|-------|-------|-------|-----|
| <b>Rat ID</b> | 20.5 | 20 | 16   | #1  |  | 74 | 42 | 63 | #7  |  | 348.5 | 121   | 305.5 | #7  |
| <b>FG 315</b> | 14.5 | 13 | 2.5  | #2  |  | 92 | 65 | 57 | #8  |  | 378.5 | 280.5 | 332.5 | #8  |
|               | 18   | 12 | 7    | #4  |  | 87 | 33 | 74 | #9  |  | 381.5 | 382   | 395.5 | #9  |
|               | 21   | 10 | 16.5 | #10 |  | 56 | 37 | 54 | #13 |  | 367.5 | 249   | 359   | #13 |

METH+CORT

|               |      |      |      |     |  |   |   |   |     |  |     |     |     |     |
|---------------|------|------|------|-----|--|---|---|---|-----|--|-----|-----|-----|-----|
| <b>Rat ID</b> | 29   | 10   | 22.5 | #3  |  | 0 | 0 | 0 | #7  |  | 1.5 | 2.5 | 0.5 | #7  |
| <b>FG 272</b> | 23   | 12   | 20   | #4  |  | 1 | 1 | 0 | #8  |  | 2   | 3.5 | 1.5 | #8  |
|               | 19.5 | 11.5 | 12.5 | #5  |  | 0 | 0 | 1 | #9  |  | 0.5 | 4.5 | 0   | #9  |
|               | 29   | 13   | 17.5 | #10 |  | 0 | 0 | 0 | #14 |  | 0   | 1.5 | 0   | #14 |

METH+CORT

|               |     |     |      |     |  |   |   |   |     |  |     |      |     |     |
|---------------|-----|-----|------|-----|--|---|---|---|-----|--|-----|------|-----|-----|
| <b>Rat ID</b> | 9   | 9   | 3    | #5  |  | 3 | 8 | 8 | #11 |  | 0   | 8    | 0   | #8  |
| <b>FG 285</b> | 11  | 12  | 11.5 | #6  |  | 0 | 6 | 5 | #12 |  | 0.5 | 12.5 | 1   | #9  |
|               | 9   | 10  | 8    | #7  |  | 4 | 6 | 5 | #14 |  | 0   | 11   | 1   | #13 |
|               | 9.5 | 9.5 | 9.5  | #15 |  | 0 | 7 | 5 | #17 |  | 2.5 | 9.5  | 1.5 | #19 |

METH+CORT

|               |      |      |  |     |  |    |    |  |     |  |       |       |  |     |
|---------------|------|------|--|-----|--|----|----|--|-----|--|-------|-------|--|-----|
| <b>Rat ID</b> | 12   | 13   |  | #3  |  | 20 | 17 |  | #6  |  | 55    | 75.5  |  | #7  |
| <b>FG 286</b> | 13.5 | 14.5 |  | #11 |  | 18 | 18 |  | #7  |  | 118   | 126.5 |  | #8  |
|               | 8    | 13.5 |  | #12 |  | 25 | 25 |  | #9  |  | 105.5 | 132   |  | #9  |
|               | 12.5 | 16   |  | #13 |  | 16 | 14 |  | #10 |  | 124   | 119   |  | #14 |

METH+CORT

|               |    |    |      |    |  |   |    |   |    |  |       |     |       |     |
|---------------|----|----|------|----|--|---|----|---|----|--|-------|-----|-------|-----|
| <b>Rat ID</b> | 16 | 17 | 16.5 | #3 |  | 8 | 15 | 8 | #8 |  | 227.5 | 201 | 128.5 | #12 |
|---------------|----|----|------|----|--|---|----|---|----|--|-------|-----|-------|-----|

|        |    |      |      |     |  |    |    |    |     |  |       |       |      |     |
|--------|----|------|------|-----|--|----|----|----|-----|--|-------|-------|------|-----|
| FG 304 | 17 | 19   | 17.5 | #6  |  | 5  | 8  | 5  | #10 |  | 199.5 | 239   | 185  | #13 |
|        | 38 | 27.5 | 26   | #14 |  | 10 | 9  | 10 | #17 |  | 71.5  | 247.5 | 53   | #17 |
|        | 24 | 16   | 26.5 | #15 |  | 11 | 12 | 9  | #18 |  | 82.5  | 195   | 72.5 | #18 |

METH+CORT

|                  |      |      |      |     |  |   |   |   |     |  |     |      |      |     |
|------------------|------|------|------|-----|--|---|---|---|-----|--|-----|------|------|-----|
| Rat ID<br>FG 306 | 21.5 | 18   | 17.5 | #2  |  | 7 | 7 | 7 | #4  |  | 15  | 13   | 14.5 | #4  |
|                  | 20.5 | 16.5 | 18   | #3  |  | 5 | 5 |   | #5  |  | 7.5 | 8.5  | 7.5  | #9  |
|                  | 13   | 12   | 9.5  | #10 |  | 5 | 4 | 4 | #11 |  | 2.5 | 8.5  | 0.5  | #11 |
|                  | 14   | 12   | 13   | #17 |  | 4 | 5 | 4 | #13 |  | 11  | 11.5 | 10   | #18 |

METH+CORT

|                  |      |      |      |     |  |   |   |   |     |  |     |       |       |     |
|------------------|------|------|------|-----|--|---|---|---|-----|--|-----|-------|-------|-----|
| Rat ID<br>FG 316 | 28.5 | 26.5 | 29.5 | #3  |  | 0 | 1 | 0 | #7  |  | 122 | 155.5 | 117.5 | #7  |
|                  | 19   | 26   | 17.5 | #4  |  | 0 | 1 | 0 | #8  |  | 142 | 212   | 141   | #8  |
|                  | 44.5 | 30   | 40.5 | #10 |  | 4 | 1 | 5 | #9  |  | 171 | 196   | 168.5 | #9  |
|                  | 28   | 26.5 | 27   | #12 |  | 0 | 2 | 0 | #13 |  | 146 | 205   | 145   | #13 |

METH+CORT

|                  |      |      |      |      |  |   |    |   |     |  |      |      |      |      |
|------------------|------|------|------|------|--|---|----|---|-----|--|------|------|------|------|
| Rat ID<br>FG 317 | 20   | 14   | 12.5 | #1B  |  | 7 | 5  | 7 | #5  |  |      |      |      | #4   |
|                  | 16   | 16   | 12   | #9   |  | 5 | 4  | 4 | #6  |  | 64.5 | 45.5 | 64.5 | #5   |
|                  | 25.0 | 19.5 | 29.0 | #10B |  | 5 | 5  | 5 | #7  |  | 45.5 | 37   | 45.5 | #6   |
|                  | 23   | 20.5 | 21   | #11  |  | 9 | 10 | 8 | #10 |  | 22   | 26.5 | 22   | #7   |
|                  |      |      |      |      |  |   |    |   |     |  | 64   | 67.5 | 57   | #10A |

Supplemental Figure 1. METH vs noMETH blood glucose levels

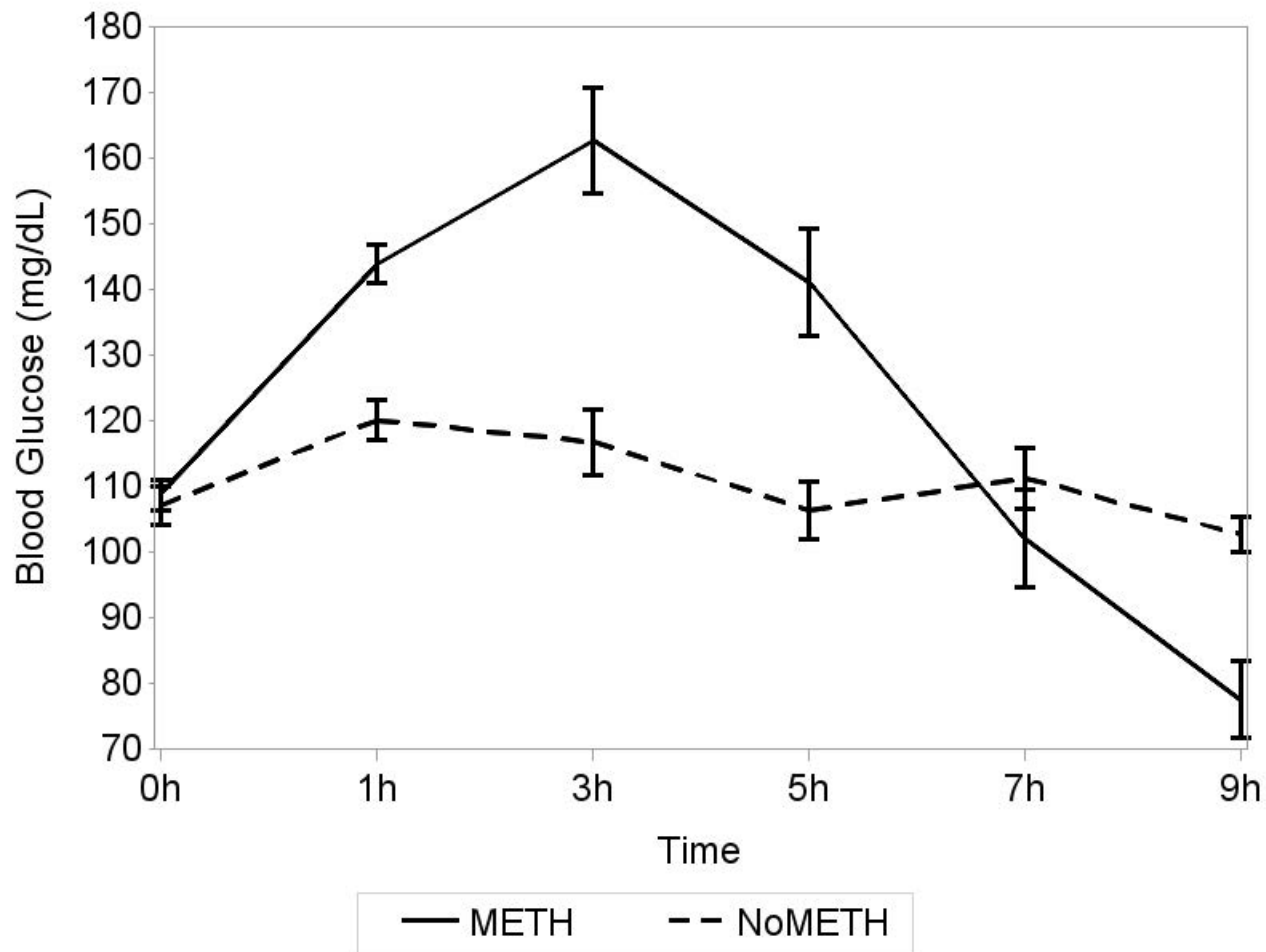

Mean ( $\pm$  SEM) blood glucose levels for METH (Saline, Glucose, and CORT) and noMETH (METH, METH+Glucose, and METH+CORT) treatment groups. Blood glucose was determined 1h after each of injection of METH and also at 3 h after the last set injection from blood obtained from the hindfoot toe pad.

Supplemental Figure 2. METH+CORT vs METH+Veh blood glucose levels

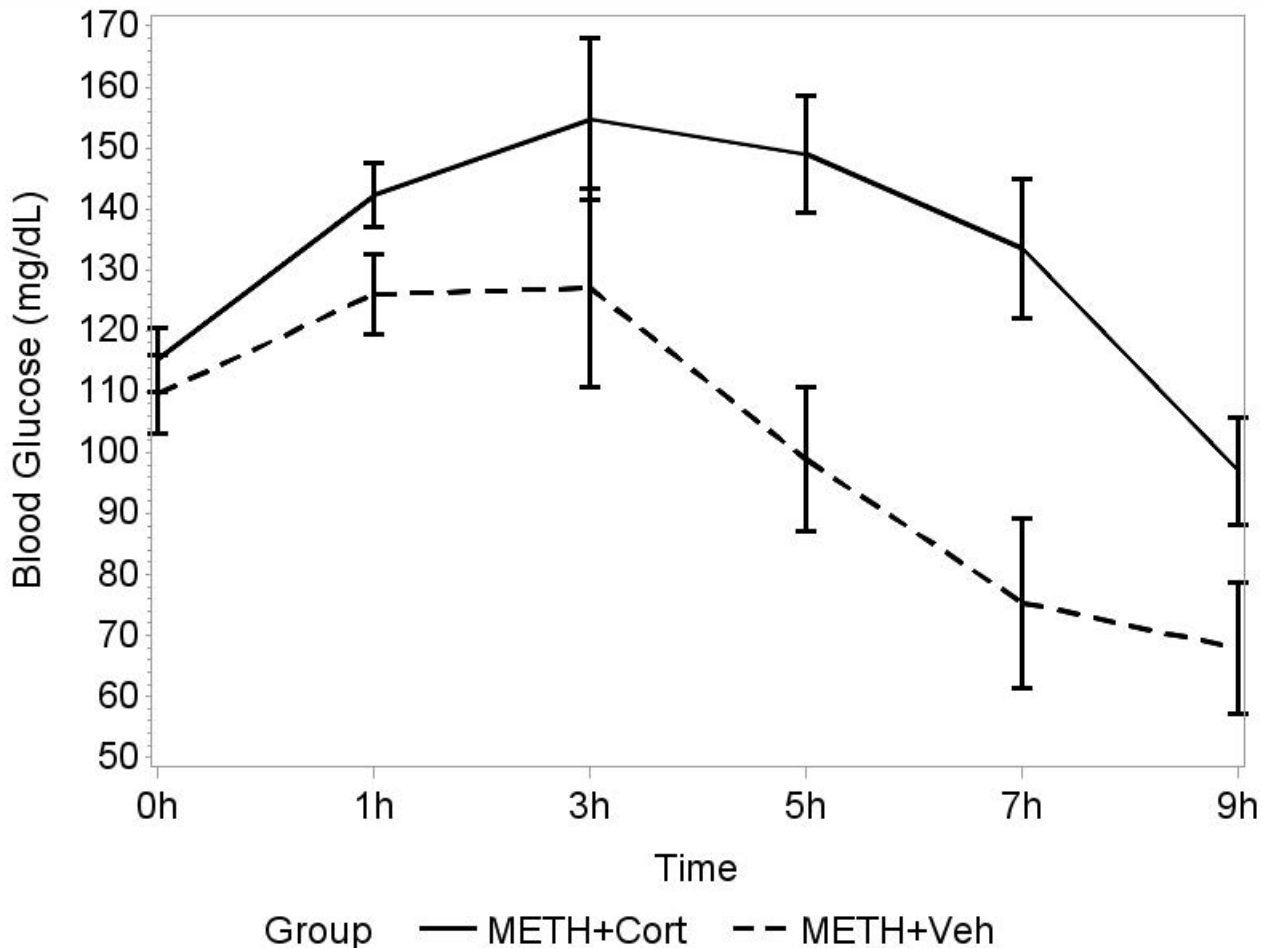

Mean ( $\pm$  SEM) blood glucose levels are shown for the METH+CORT and METH+Veh treatment groups. Blood glucose was determined 1h after each of injection of METH and also at 3 h after the last set injection from blood obtained from the hindfoot toe pad.



Supplemental Figure 3. METH vs noMETH body temperature levels

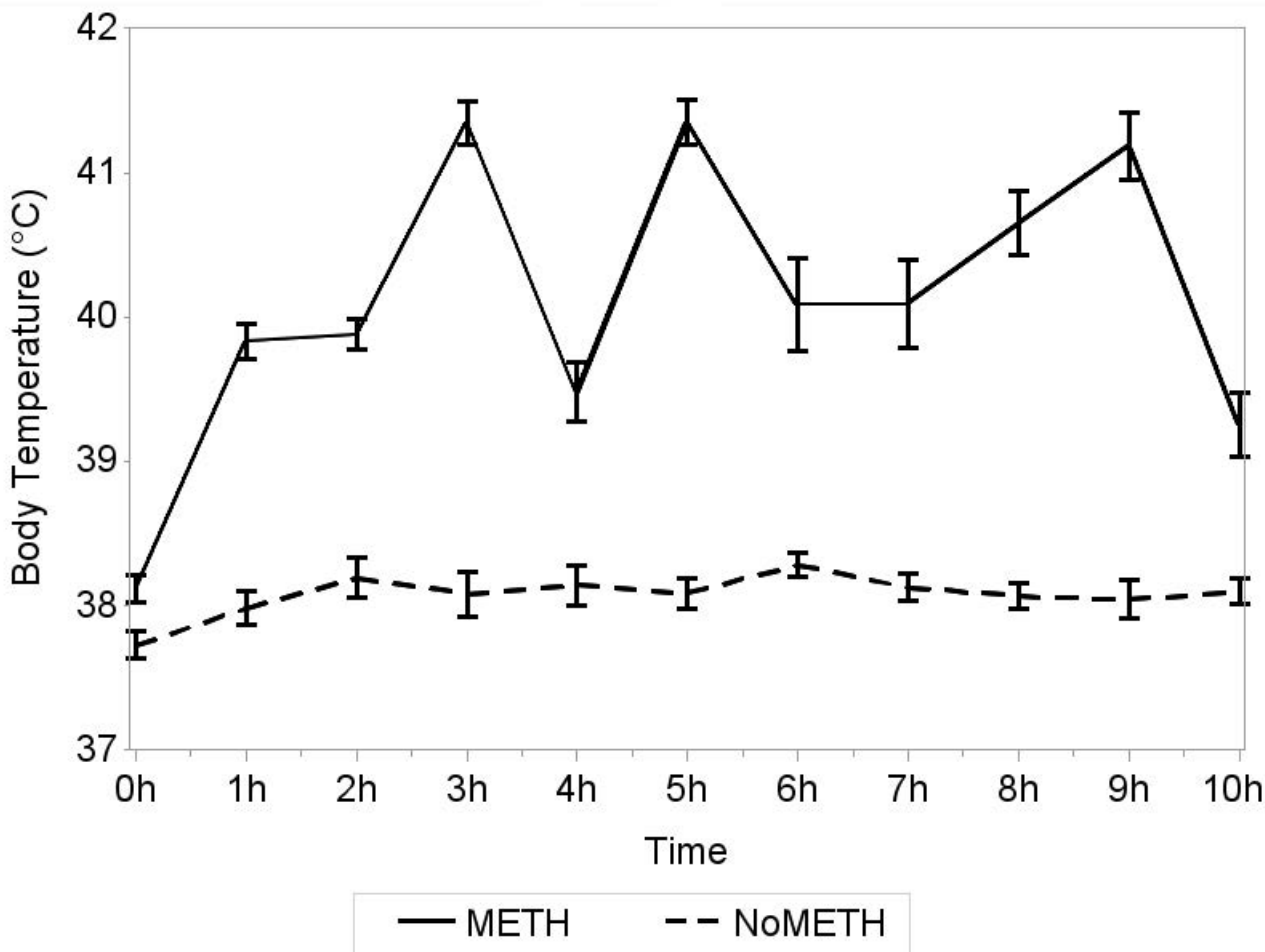

Mean ( $\pm$  SEM) body temperature levels for METH (Saline, Glucose, and CORT) and noMETH (METH, METH+Glucose, and METH+CORT) treatment groups. Upper colonic temperature was determined every hour.

Supplemental Figure 4. METH+CORT vs METH+Veh body temperature levels

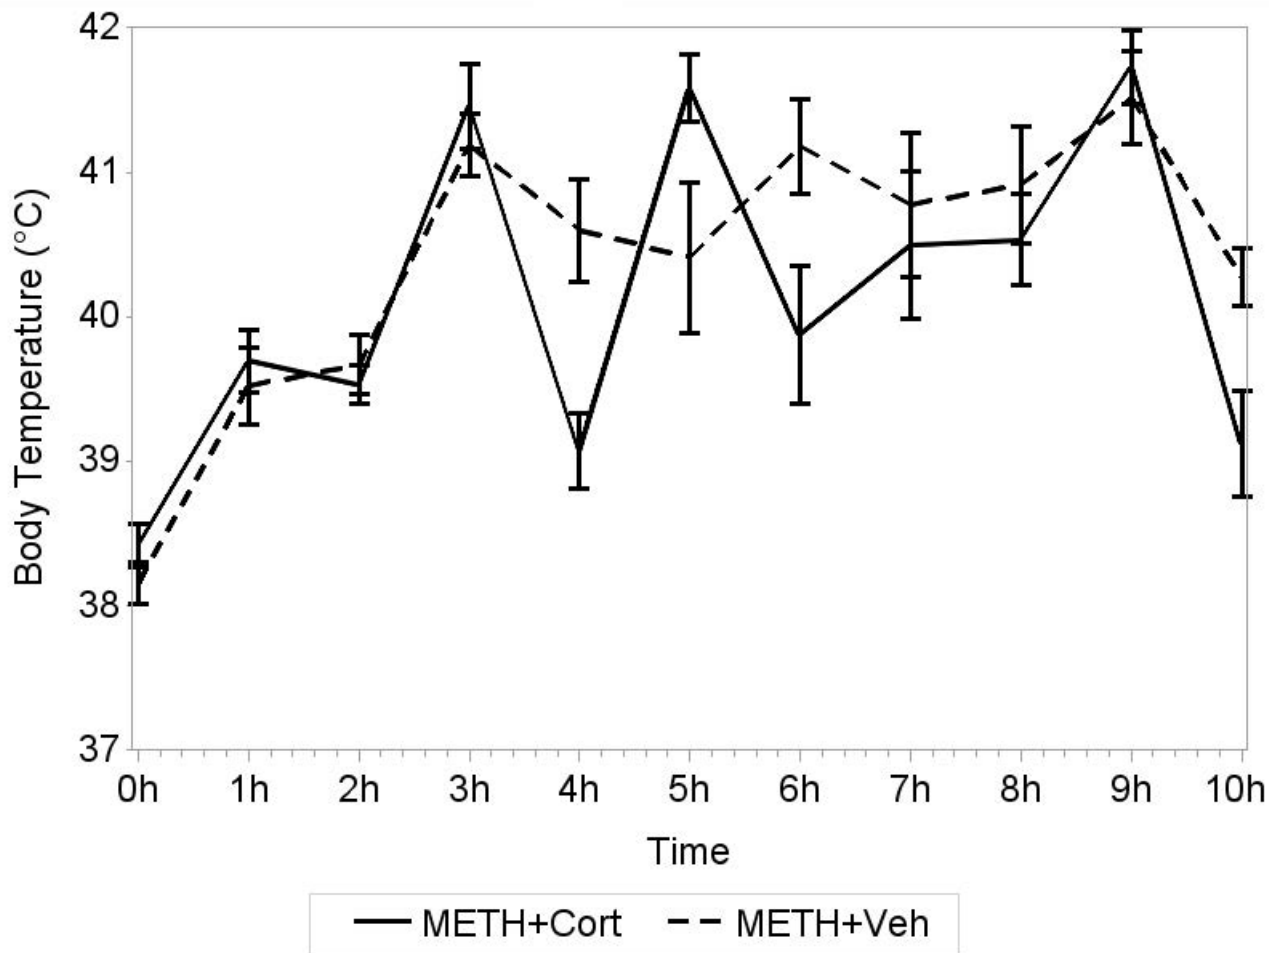

Mean ( $\pm$  SEM) body temperature levels are shown for the METH+CORT and METH+Veh treatment groups. Upper colonic temperature was determined every hour.

Supplemental Figure 5. FJc-labeling of degenerating neurons in three of the METH treatment groups

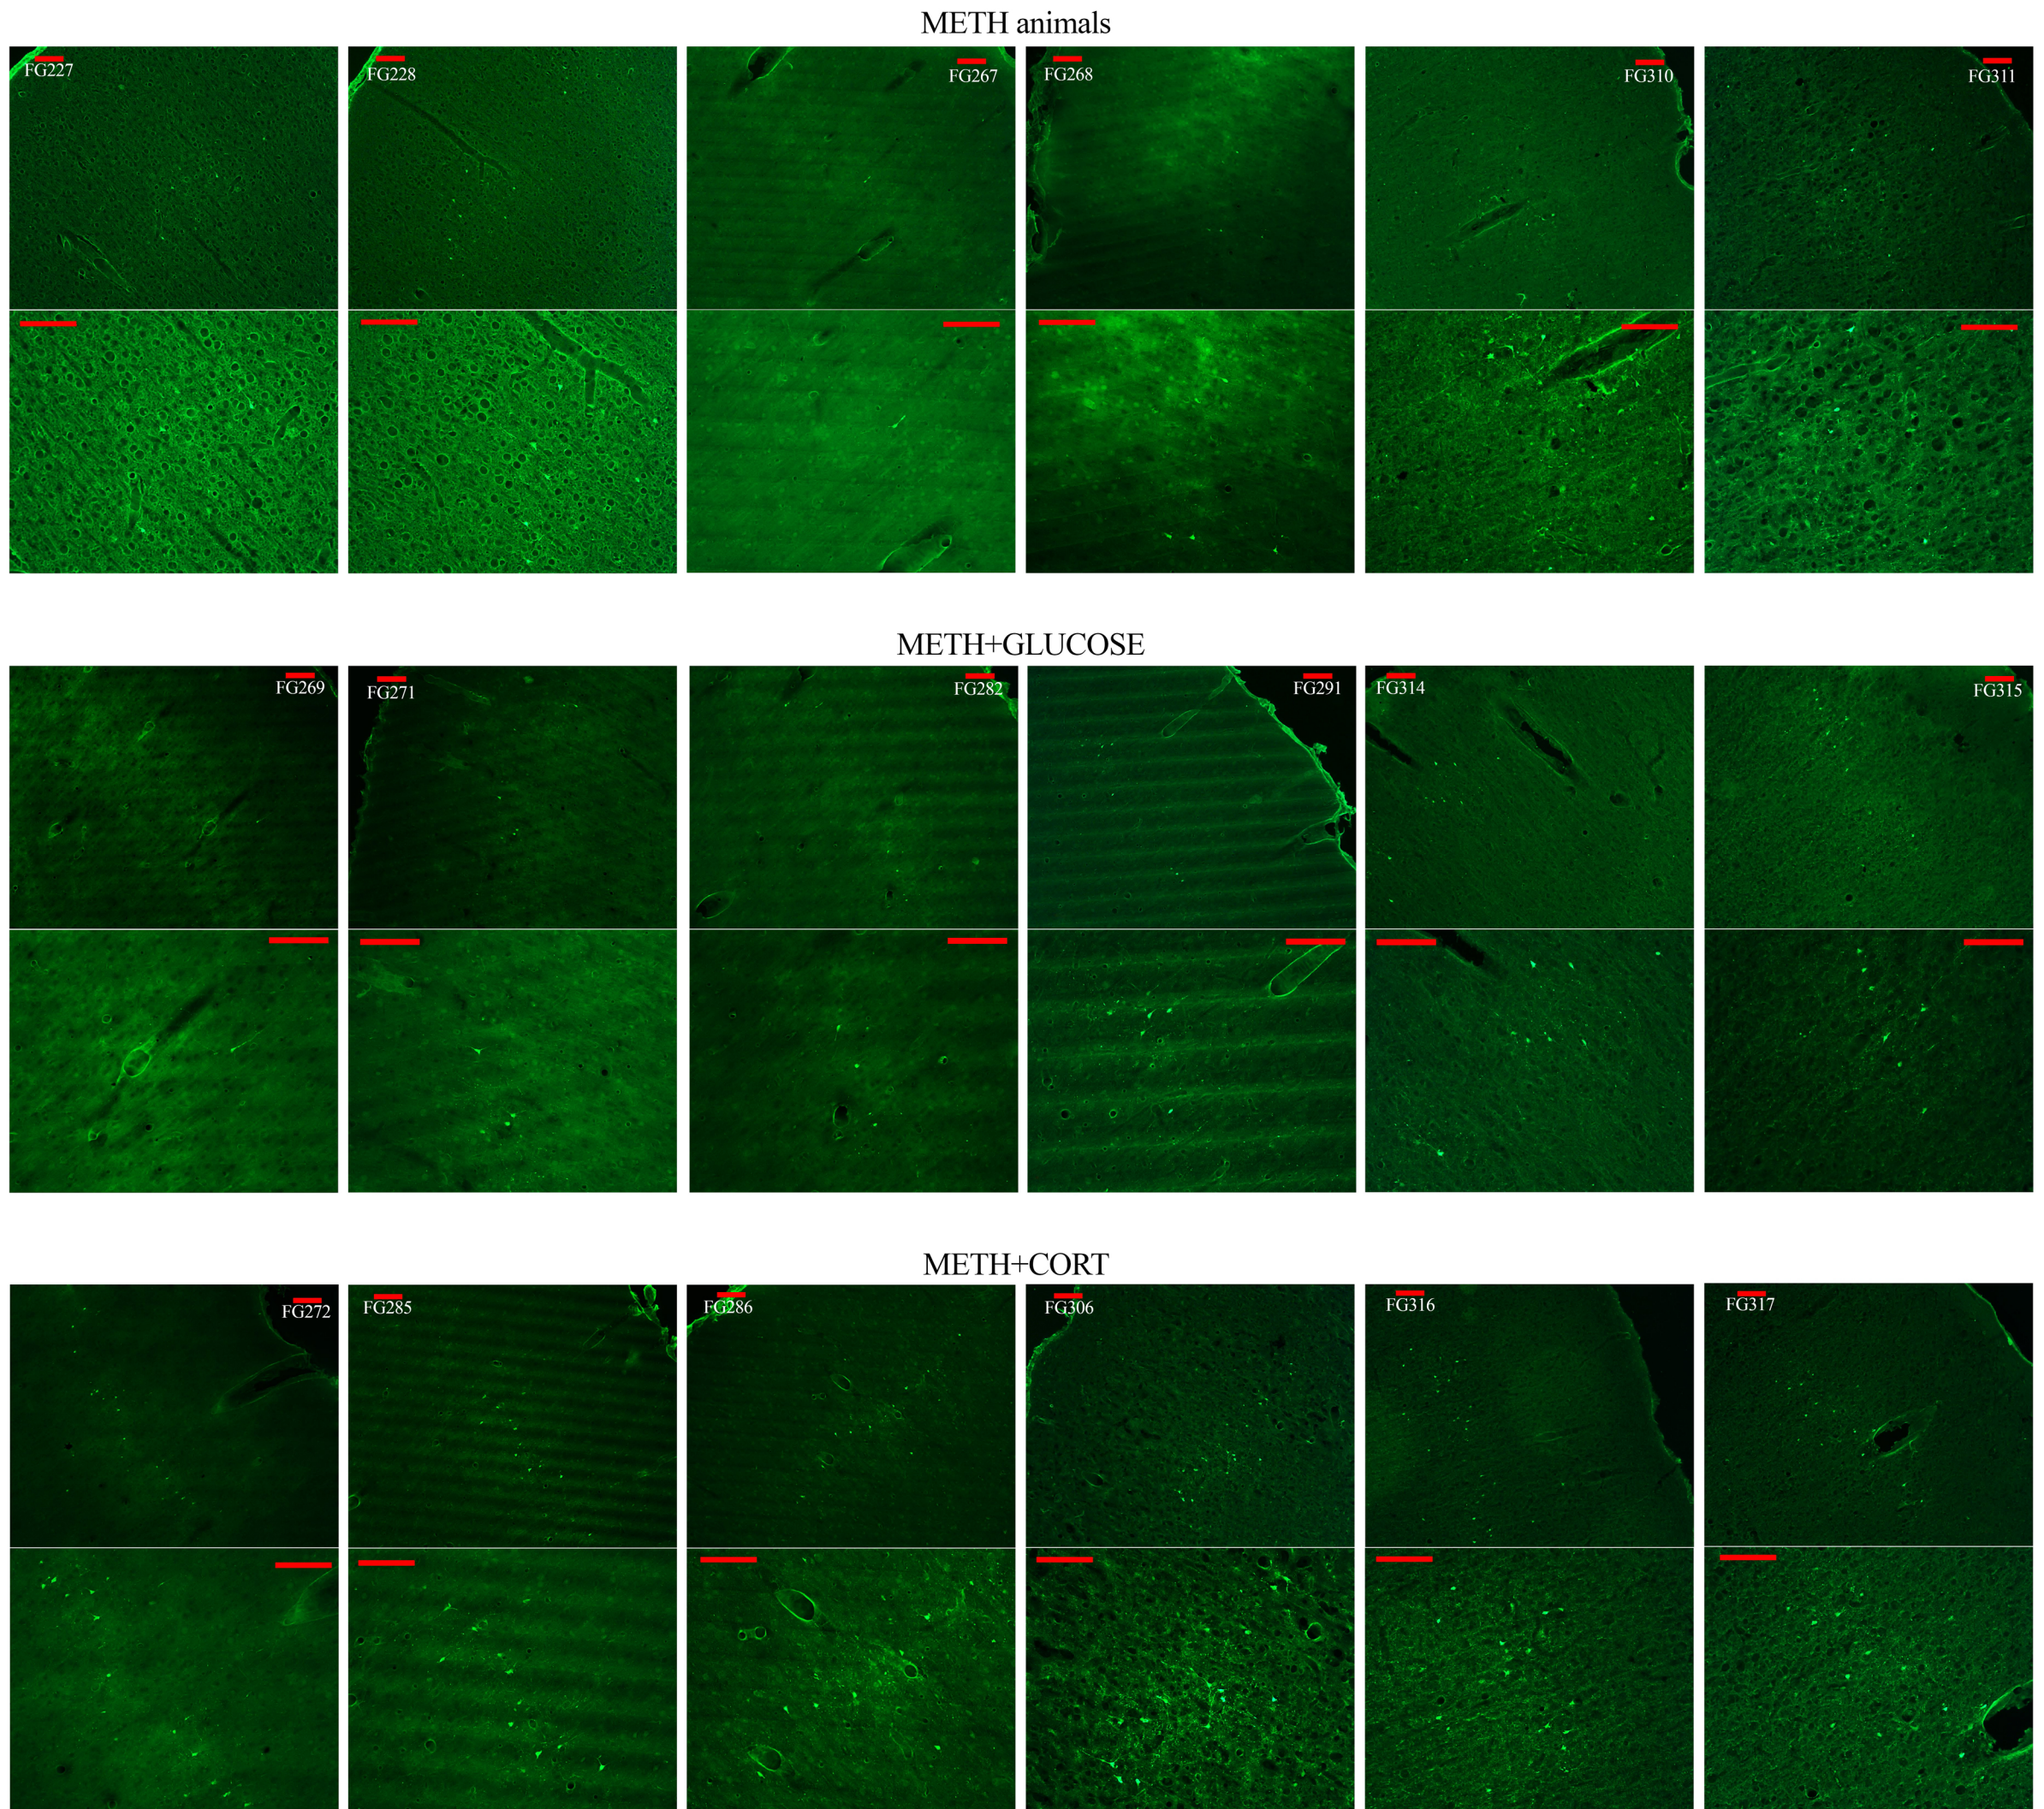

Representative images of histological sections labeled with FJc for animals in the METH, METH+Glucose, and METH+CORT groups are presented. There was a significant difference in neurodegeneration in the parietal cortex when comparing METH+CORT to METH, METH+Glucose, and METH+Veh (See Table 2 in text) Saline and CORT groups are not shown since there was virtually no FJc-labeling present.

# Supplemental Figure 6. "Screen Shot" of Nikon NIS Display of an image of the parietal cortex and setting an parameters used for image analysis.

The screenshot displays the Nikon NIS Elements software interface. The main window shows a photomicrograph of a parietal cortex section with a red ellipse highlighting a region of interest (ROI). The software interface includes various toolbars and panels:

- DS-R11 Settings:** Resolution: 1280x1024 Fast, Normal; Quality: 1280x1024 Fine - 8bit; Exposure: Auto Exposure, 1 s; Analog Gain: 4.0x; AE Compensation: -1.3 EV; Color: Auto White; Scene Mode: > Commands.
- Object Count:** Threshold RGB; Restrictions: EqDiameter (µm); Result: Total Area: 1.231e+007 µm<sup>2</sup>; Measured Area: 3.18 %; **3251** objects detected.
- Object Count Table:**

| ROI ID | Binary ID     | #   | Area   | EqDiameter | Perimeter | Length | Width |
|--------|---------------|-----|--------|------------|-----------|--------|-------|
| ROI 1  | Threshold (2) | 681 | 583.93 | 27.27      | 231.28    | 110.55 | 5.29  |
| ROI 1  | Threshold (2) | 698 | 329.12 | 20.47      | 124.22    | 56.26  | 5.85  |
| ROI 1  | Threshold (2) | 705 | 631.70 | 28.36      | 170.03    | 76.79  | 8.23  |
| ROI 1  | Threshold (2) | 748 | 26.54  | 8.81       | 18.90     | 7.46   | 3.56  |
| ROI 1  | Threshold (2) | 749 | 451.22 | 23.97      | 157.67    | 72.62  | 6.21  |
| ROI 1  | Threshold (2) | 761 | 599.85 | 27.64      | 166.41    | 75.23  | 7.57  |
| ROI 1  | Threshold (2) | 769 | 10.62  | 3.69       | 11.08     | 5.56   | 1.91  |

A representative "screen shot" of a photomicrographs (4X) which shows an image of cortical layers II through Layer V of the vibrissae somatosensory S1 barrel fields and a portion of the more dorsal S2 barrel fields. NIS Elements Software (Nikon) was used to detect and measure microglia within the analyzed region of interest (ROI) shown enclosed by the red ellipse. The ROI was standardized and kept constant. The intensity range selection points for detecting the microglia were set to eliminate (as much as possible) as many of the minor processes not connected to somas. However, many of the darkly stained isolated distal process were still captured. Setting intensity capture parameters to exclude all of the darkly stained distal processes was not an option since it resulted in exclusion of smaller or more lightly stained microglia soma and adjoining processes.
